# Supplementary material
Source: publisher figshare collection journal article supplement (https://acs.figshare.com/ndownloader/files/3810493)
Supplement: Supplementary file 1 [file 3810493]

## Sheet: Multicomponent Data
Application of a High-Throughput Analyzer in Evaluating Solid Adsorbents for Post-Combustion Carbon Capture via Multicomponent Adsorption of CO2, N2, and H2O
Jarad A. Mason, Thomas M. McDonald, Tae-Hyun Bae, Jonathan E. Bachman, Kenji Sumida, Justin J. Dutton, Steven S. Kaye, Jeffrey R. Long
Adsorbent	P CO2 (mbar)	CO2 adsorbed (mmol/g)	CO2 adsorbed error (mmol/g)	Pure CO2 adsorbed (mmol/g)	P N2 (mbar)	N2 adsorbed (mmol/g)	N2 adsorbed error (mmol/g)	P H2O (mbar)	H2O adsorbed (mmol/g)	H2O adsorbed error (mmol/g)	P total (mbar)	T (°C)
AX-21 carbon	166	0.3	0.1	0.35	679	0.3	0.1	20	0	0.2	865	40	*		*Indicates data point used in Figure 15
MOF-5	173	0.1	0.1	0.11	686	0.1	0.1	11	0.4	0.2	870	40	*
Mg2(dobdc)	162	1	0.2	4.8	686	0.3	0.3	1	8.1	0.4	849	40			All errors are at a 95% confidence interval
Mg2(dobdc)	171	0.5	0.3	4.87	689	0	0.4	23	14.2	0.5	883	40	*
Mg2(dobdc)	164	1	0.2	4.81	688	0.4	0.3	2	12.4	0.5	854	40			Error in P CO2 is 3.6 mbar
Ni2(dobdc)	154	0.7	0.1	3.18	686	0.3	0.1	2	6.3	0.3	842	40			Error in P N2 is 3.5 mbar
Ni2(dobdc)	175	0.3	0.2	3.39	695	0.3	0.3	3	19.4	0.4	873	40			Error in P H2O is 3.4 mbar
Ni2(dobdc)	177	0.1	0.2	3.41	684	0.3	0.3	10	23	0.5	871	40	*
zeolite 13X	163	0.7	0.2	3.96	691	0.2	0.2	1	7	0.3	855	40			Error in pure CO2 adsorbed is less than 0.1 mmol/g
zeolite 13X	179	0.1	0.2	4.05	697	0.2	0.3	2	7.1	0.4	878	40
zeolite 13X	178	0	0.3	4.05	687	0.1	0.3	10	15.2	0.5	875	40	*
zeolite 5A	156	1	0.2	4.04	691	0.2	0.2	1	4.7	0.3	848	40
zeolite 5A	171	0.3	0.2	4.12	689	0	0.2	15	9.6	0.3	875	40	*
zeolite 5A	175	0.1	0.2	4.14	688	0	0.3	13	6.9	0.4	876	40
HKUST-1	163	0.7	0.2	0.6	691	0.4	0.2	2	1.5	0.3	856	40
HKUST-1	154	1	0.2	0.94	685	0.3	0.2	1	1.5	0.3	840	25
HKUST-1	163	0.7	0.2	0.6	686	0.2	0.2	4	7.7	0.3	853	40
HKUST-1	161	0.7	0.2	0.59	686	0.4	0.2	1	1.9	0.3	848	40
HKUST-1	174	0.2	0.2	0.64	695	0	0.2	24	13.5	0.3	893	40
HKUST-1	177	0	0.2	0.65	689	0	0.2	24	18.2	0.3	890	40	*
Fe-MIL-100	259	0.4	0.1	0.56	608	0.2	0.2	23	8.9	0.3	890	40
Fe-MIL-100	240	0.3	0.1	0.52	560	0.2	0.2	7	4.2	0.3	807	25
Fe-MIL-100	174	0.3	0.2	0.4	686	0.3	0.3	12	4.9	4	872	40
Fe-MIL-100	175	0.3	0.3	0.4	689	0.5	0.3	20	6.8	0.5	884	40	*
Zn(pyrz)2(SiF6)	158	0.9	0.2	2.44	688	0	0.2	13	3.8	0.3	859	40
Zn(pyrz)2(SiF6)	176	0	0.2	2.47	683	0.1	0.3	13	6.4	0.4	872	40
Zn(pyrz)2(SiF6)	160	0.8	0.2	2.45	700	0	0.2	14	4.2	0.3	874	40
Zn(pyrz)2(SiF6)	175	0.2	0.2	2.47	695	0.1	0.2	14	7	0.3	884	40	*
mmen-CuBTTri	162	0.9	0.2	1.18	685	0	0.3	28	5.4	0.4	875	40	*
mmen-CuBTTri	168	0.7	0.2	1.2	695	0	0.3	20	3	0.4	883	40
mmen-Mg2(dobpdc)	254	4.1	0.2	3.8	512	0	0.2	16	5.6	0.4	782	40
mmen-Mg2(dobpdc)	258	3.9	0.2	3.81	513	0	0.2	16	5.7	0.4	787	40
mmen-Mg2(dobpdc)	92	4	0.2	3.68	691	0.1	0.2	20	9.5	0.3	803	40
mmen-Mg2(dobpdc)	139	3.8	0.2	3.72	521	0	0.2	16	4.9	0.3	676	40
mmen-Mg2(dobpdc)	113	4.2	0.2	3.7	689	0	0.3	19	6.5	0.5	821	40	*
mmen-Mg2(dobpdc)	106	3.6	0.2	3.69	701	0	0.2	17	5.6	0.4	824	40
mmen-Ni2(dobpdc)	159	0.9	0.2	0.41	689	0.3	0.2	17	1.4	0.3	865	40
mmen-Ni2(dobpdc)	150	1.3	0.2	0.39	691	0.1	0.2	29	4.1	0.3	870	40	*
mmen-Ni2(dobpdc)	146	1.1	0.1	0.38	686	0.1	0.2	18	2.6	0.3	850	40
1°-MCM-41	157	1.2	0.2	1.6	695	0.1	0.3	19	4.6	0.4	871	40	*
1°-MCM-41	154	1.1	0.2	1.59	683	0.2	0.2	17	2.8	0.3	854	40
2°-MCM-41	149	1.3	0.2	1.29	694	0.2	0.2	17	2.8	0.3	860	40
2°-MCM-41	155	1.5	0.2	1.3	698	0.2	0.3	17	4.2	0.4	870	40	*
2°-MCM-41	147	1.3	0.2	1.29	696	0.1	0.2	22	2.9	0.3	865	40
PEI-MCM-41	114	2.5	0.1	1.53	691	0	0.2	17	3.4	0.3	822	40	*
						S-26

## Sheet: Bar graph
Adsorbent	P CO2 (mbar)	CO2 adsorbed (mmol/g)	CO2 adsorbed error (mmol/g)	Pure CO2 adsorbed (mmol/g)	P N2 (mbar)	N2 adsorbed (mmol/g)	N2 adsorbed error (mmol/g)	P H2O (mbar)	H2O adsorbed (mmol/g)	H2O adsorbed error (mmol/g)	P total (mbar)	T (°C)
AX-21 carbon	166	0.3	0.1	0.35	679	0.3	0.1	20	0	0.2	865	40	*
MOF-5	173	0.1	0.1	0.11	686	0.1	0.1	11	0.4	0.2	870	40	*
Mg2(dobdc)	171	0.5	0.3	4.87	689	0	0.4	23	14.2	0.5	883	40	*
Ni2(dobdc)	177	0.1	0.2	3.41	684	0.3	0.3	10	23	0.5	871	40	*
zeolite 13X	178	0	0.3	4.05	687	0.1	0.3	10	15.2	0.5	875	40	*
zeolite 5A	171	0.3	0.2	4.12	689	0	0.2	15	9.6	0.3	875	40	*
HKUST-1	177	0	0.2	0.65	689	0	0.2	24	18.2	0.3	890	40	*
Fe-MIL-100	175	0.3	0.3	0.4	689	0.5	0.3	20	6.8	0.5	884	40	*
Zn(pyrz)2(SiF6)	175	0.2	0.2	2.47	695	0.1	0.2	14	7	0.3	884	40	*
mmen-CuBTTri	162	0.9	0.2	1.18	685	0	0.3	28	5.4	0.4	875	40	*
mmen-Mg2(dobpdc)	113	4.2	0.2	3.7	689	0	0.3	19	6.5	0.5	821	40	*
mmen-Ni2(dobpdc)	150	1.3	0.2	0.39	691	0.1	0.2	29	4.1	0.3	870	40	*
1°-MCM-41	157	1.2	0.2	1.6	695	0.1	0.3	19	4.6	0.4	871	40	*
2°-MCM-41	155	1.5	0.2	1.3	698	0.2	0.3	17	4.2	0.4	870	40	*
PEI-MCM-41	114	2.5	0.1	1.53	691	0	0.2	17	3.4	0.3	822	40	*
						S-27
